# Supplementary material for: Transcriptome analysis of the livers of ducklings hatched normally and with assistance
Source: PubMed Central journal article supplement — Asian-Australas J Anim Sci. 2016 Oct 28;30(6):773–80. doi: 10.5713/ajas.16.0528 (PMC5411839; doi:10.5713/ajas.16.0528), 2016-10-28
Supplement: ajas-30-6-773-supplementary.pdf [file ajas-30-6-773-supplementary.pdf]

### Differentially expressed genes involved in the metabolic pathways in normally hatched and helped ducklings.

| Unigenes Locus         | Gene name                                                         | Helped_Expression value | Normal_Expression value | Log <sub>2</sub> Ratio(Helped/Norma | FDR       |
|------------------------|-------------------------------------------------------------------|-------------------------|-------------------------|-------------------------------------|-----------|
| Norm_comp221_c0_seq7   | Glucose-6-phosphatase                                             | 204.609                 | 87.7132                 | 1.222                               | 0.045876  |
| Norm_comp171_c0_seq4   | ATP synthase subunit alpha                                        | 74.6398                 | 26.2309                 | 1.50868                             | 0.001884  |
| Help_comp33382_c0_seq1 | Inositol oxygenase                                                | 3.75044                 | 0.698638                | 2.42444                             | 0.006602  |
| Help_comp15352_c1_seq1 | Sodium/myo-inositol cotransporter                                 | 3.47908                 | 1.22972                 | 1.50037                             | 0.003237  |
| Norm_comp14068_c0_seq1 | Neuropeptide Y receptor 4                                         | 2.21758                 | 0.797231                | 1.47591                             | 0.040749  |
| Norm_comp685_c0_seq3   | Hyaluronidase-1                                                   | 49.3671                 | 20.2078                 | 1.28864                             | 0.023467  |
| Norm_comp9226_c0_seq1  | All-trans-retinol 13,14-reductase                                 | 3.1277                  | 0.187764                | 4.05811                             | 0.029544  |
| Norm_comp4988_c0_seq1  | Aquaporin-1                                                       | 11.1005                 | 3.97338                 | 1.48218                             | 0.01881   |
| Norm_comp973_c0_seq5   | Sulfotransferase family cytosolic 2B member 1                     | 59.8945                 | 19.8305                 | 1.5947                              | 0.00226   |
| Help_comp11371_c0_seq1 | Elongation of very long chain fatty acids family member protein 2 | 10.1844                 | 1.41012                 | 2.85248                             | 0         |
| Norm_comp13976_c0_seq1 | Intestinal-type alkaline phosphatase                              | 3.0879                  | 0.063036                | 5.61431                             | 0.000106  |
| Norm_comp1658_c0_seq1  | Low-density lipoprotein receptor-related protein 1                | 8.66838                 | 3.87403                 | 1.16193                             | 0.03711   |
| Help_comp15933_c0_seq2 | cytochrome P450 2C45                                              | 6.41979                 | 1.84481                 | 1.79905                             | 0.0069833 |
| Norm_comp1621_c0_seq1  | N-acetylgalactosamine-6-sulfatase                                 | 11.8727                 | 3.84753                 | 1.62564                             | 0.0004957 |
| Help_comp1780_c0_seq4  | galactokinase                                                     | 1.45E+00                | 1.06E+01                | -2.86E+00                           | 4.84E-09  |
| Help_comp1197_c3_seq1  | Xanthine dehydrogenase/oxidase                                    | 8.06485                 | 17.8975                 | -1.15004                            | 0.042085  |
| Help_comp19286_c0_seq1 | Septin-4                                                          | 0.231552                | 1.12764                 | -2.2839                             | 0.017205  |
| Help_comp2563_c0_seq1  | Rho-related GTP-binding protein RhoC                              | 7.14251                 | 17.2506                 | -1.27215                            | 0.02548   |
| Help_comp3856_c0_seq1  | Oligoadenylate synthetase-like 2                                  | 0.919919                | 11.6429                 | -3.66179                            | 4.49E-11  |
| Help_comp476_c0_seq249 | Cytosolic purine 5'-nucleotidase                                  | 0.419083                | 1.70154                 | -2.02153                            | 0.013445  |
| Help_comp6680_c0_seq4  | Ephrin-A1                                                         | 1.77044                 | 8.43337                 | -2.252                              | 0.001117  |
| Help_comp707_c2_seq2   | Bifunctional coenzyme A synthase                                  | 4.29691                 | 10.2518                 | -1.25451                            | 0.019976  |
| Help_comp7075_c0_seq1  | Galactose-1-phosphate uridylyltransferase                         | 0.921413                | 2.8304                  | -1.61909                            | 0.012216  |
| Help_comp8232_c0_seq1  | Elongation factor 1-alpha                                         | 0                       | 3.02535                 |                                     | 0.006327  |
| Norm_comp10156_c0_seq3 | UMP-CMP kinase 2                                                  | 1.09273                 | 3.63923                 | -1.73569                            | 0.008128  |
| Help_comp1671_c0_seq1  | Phosphatidate phosphatase                                         | 8.66133                 | 19.649                  | -1.18179                            | 0.0363    |
| Help_comp6076_c0_seq1  | Insulin-induced gene 1                                            | 2.72723                 | 6.11561                 | -1.16506                            | 0.049106  |
| Help_comp833_c0_seq1   | Apolipoprotein AIV                                                | 33.8998                 | 88.0706                 | -1.37738                            | 0.004379  |
| Norm_comp3973_c0_seq1  | Phosphoenolpyruvate carboxykinase                                 | 3.31411                 | 13.4821                 | -2.02435                            | 2.81E-06  |
| Help_comp675_c0_seq2   | Cytochrome P450 1A5                                               | 10.254                  | 32.9315                 | -1.68328                            | 9.49E-05  |
| Help_comp9412_c0_seq3  | DNA-directed RNA polymerase                                       | 1.23401                 | 5.79832                 | -2.23228                            | 0.011598  |
| Help_comp9249_c0_seq2  | Argininosuccinate synthase                                        | 0.424901                | 2.66004                 | -2.64625                            | 0.006633  |
| Help_comp8021_c0_seq13 | Proline dehydrogenase 1                                           | 0.46345                 | 1.62117                 | -1.80655                            | 0.019567  |
| Help_comp1125_c0_seq1  | Glycine dehydrogenase                                             | 18.9211                 | 45.6986                 | -1.27215                            | 0.019743  |
| Norm_comp408_c0_seq1   | Phosphoserine aminotransferase                                    | 175.142                 | 526.476                 | -1.58784                            | 0.049025  |
| Help_comp3970_c0_seq1  | Cyclin-dependent kinase inhibitor 1                               | 0.525997                | 2.06208                 | -1.97097                            | 0.000274  |
| Help_comp13964_c0_seq1 | Carnitine O-acetyltransferase b                                   | 0.64084                 | 3.36148                 | -2.39106                            | 0.039983  |
| Help_comp283_c0_seq2   | D-dopachrome decarboxylase                                        | 4.13703                 | 9.51741                 | -1.20197                            | 0.037217  |
| Help_comp1651_c0_seq9  | acyl-coenzyme A thioesterase 8 isoform 2                          | 0.893905                | 5.42971                 | -2.60268                            | 0.0040784 |
| Help_comp16256_c0_seq1 | gamma-glutamyl transpeptidase 4                                   | 0.301961                | 1.35712                 | -2.16812                            | 0.0028576 |
| Help_comp12087_c0_seq1 | hydroxymethylglutaryl-CoA lyase, mitochondrial isoform 1          | 0.995497                | 3.42279                 | -1.78168                            | 0.0322201 |
| Help_comp22677_c0_seq1 | stearoyl-CoA desaturase                                           | 0.195097                | 1.09521                 | -2.48895                            | 0.048467  |
| Help_comp2399_c0_seq33 | mitochondrial GTPase 1 homolog                                    | 1.16885                 | 13.817                  | -3.56329                            | 0.0005322 |
| Help_comp2841_c0_seq3  | zinc transporter 10                                               | 5.71497                 | 16.0306                 | -1.48801                            | 0.0297753 |
| Help_comp3315_c0_seq2  | inositol oxygenase                                                | 4.7091                  | 13.5864                 | -1.52864                            | 0.0027061 |
| Help_comp10288_c0_seq1 | ATP-binding cassette sub-family A member 12                       | 0.436308                | 3.03592                 | -2.79871                            | 0.0025599 |
| Help_comp11283_c0_seq1 | adipose differentiation-related protein                           | 1.25367                 | 5.29827                 | -2.07937                            | 0.0135286 |
| Help_comp12660_c0_seq1 | cytochrome P450 1A4                                               | 0.222969                | 2.52975                 | -3.50408                            | 0.0250334 |
| Help_comp2399_c0_seq33 | mitochondrial GTPase 1 homolog                                    | 1.16885                 | 13.817                  | -3.56329                            | 0.0005322 |
| Help_comp39814_c1_seq1 | fatty acid synthase                                               | 6.125                   | 18.334                  | -1.58174                            | 0.0007343 |
| Help_comp4110_c0_seq1  | deoxyhypusine synthase-like                                       | 3.67614                 | 9.71265                 | -1.40167                            | 0.0158005 |
| Help_comp564_c0_seq13  | uridine phosphorylase 2                                           | 1.65427                 | 5.98313                 | -1.8547                             | 9.59E-05  |
| Help_comp6198_c0_seq1  | insulin-like growth factor-binding protein 3                      | 1.82705                 | 4.73386                 | -1.3735                             | 0.0160568 |
| Help_comp7003_c0_seq1  | galactose-1-phosphate uridylyltransferase                         | 1.45757                 | 6.27895                 | -2.10696                            | 0.0302042 |
| Norm_comp249_c3_seq5   | glutathione S-transferase 1                                       | 19.3586                 | 60.4215                 | -1.64209                            | 0.000181  |
| Help_comp9739_c0_seq1  | dihydropyrimidinase-related protein 3                             | 2.00848                 | 5.97706                 | -1.57334                            | 0.034616  |
| Norm_comp12383_c0_seq1 | myosin-11                                                         | 2.69159                 | 10.1288                 | -1.91193                            | 0.0115919 |
| Norm_comp1997_c0_seq12 | uridine phosphorylase 2                                           | 1.93795                 | 7.9388                  | -2.03439                            | 0.0152395 |
| Norm_comp4303_c0_seq3  | corticosteroid 11-beta-dehydrogenase isozyme 1                    | 1.24823                 | 4.46252                 | -1.83798                            | 0.0415636 |
| Norm_comp4542_c0_seq1  | ornithine decarboxylase 1                                         | 12.7809                 | 38.768                  | -1.60087                            | 0.0002816 |
| Norm_comp6361_c0_seq2  | fumarylacetoacetase                                               | 4.18884                 | 20.7687                 | -2.30979                            | 0.0005119 |

### Differentially expressed genes involved in the immune defense pathways between normally hatched and helped ducklings.

| Locus                  | Gene name                                                 | Helped_Expression value | Normal_Expression value | Log <sub>2</sub> Ratio(Helped/Norma | FDR       |
|------------------------|-----------------------------------------------------------|-------------------------|-------------------------|-------------------------------------|-----------|
| Help_comp12196_c0_seq4 | Alpha-2-macroglobulin-like protein 1                      | 1.14625                 | 0.376249                | 1.60716                             | 0.025902  |
| Help_comp5926_c1_seq1  | C-C motif chemokine 4 homolog                             | 29.8608                 | 7.64233                 | 1.96617                             | 0.00012   |
| Norm_comp934_c0_seq1   | Complement receptor type 2                                | 48.6709                 | 20.0917                 | 1.27646                             | 0.019601  |
| Norm_comp9683_c0_seq5  | Tripartite motif protein 39                               | 7.77346                 | 0.373288                | 4.3802                              | 0.0000178 |
| Norm_comp16674_c0_seq1 | immunoresponsive 1 homolog                                | 2.00805                 | 0                       | 1.79769e+308                        | 0.0001318 |
| Help_comp237_c1_seq1   | MHC class I antigen alpha chain                           | 26.8458                 | 137.259                 | -2.35414                            | 3.93E-06  |
| Help_comp2155_c0_seq2  | Major histocompatibility complex class II beta chain BLB1 | 1.56305                 | 8.77694                 | -2.48935                            | 0.0002    |
| Help_comp7965_c0_seq1  | interferon-induced guanylate-binding protein 1            | 1.49212                 | 5.07832                 | -1.76698                            | 0.0056822 |
| Help_comp11426_c0_seq1 | interferon alpha-inducible protein 6                      | 0.283368                | 1.30658                 | -2.20504                            | 0.0394725 |
| Help_comp20926_c0_seq1 | beta-defensin 9                                           | 0                       | 1.55888                 | -1.79769e+308                       | 0.0364704 |
| Help_comp1124_c0_seq1  | Chemokine                                                 | 17.8396                 | 60.4402                 | -1.76043                            | 0.000208  |
| Help_comp8674_c0_seq2  | Intercellular adhesion molecule 1                         | 0.417914                | 4.46346                 | -3.41689                            | 0.033469  |
| Help_comp1410_c0_seq4  | C4b-binding protein alpha chain                           | 3.42917                 | 11.0794                 | -1.69194                            | 0.0168318 |
| Help_comp18064_c0_seq1 | tumor necrosis factor receptor superfamily member 27      | 0.185702                | 1.46661                 | -2.98142                            | 0.0042059 |
| Help_comp16136_c0_seq1 | Ubiquitin carboxyl-terminal hydrolase                     | 0.434828                | 1.59959                 | -1.87919                            | 0.01453   |
| Help_comp1602_c1_seq17 | Fibroblast growth factor receptor 1                       | 4.12311                 | 10.155                  | -1.30039                            | 0.019288  |
| Help_comp1602_c1_seq22 | Fibroblast growth factor receptor 4                       | 7.7469                  | 18.5225                 | -1.25759                            | 0.022833  |
| Help_comp1790_c0_seq1  | DNA-binding protein inhibitor ID-2                        | 39.404                  | 120.676                 | -1.61472                            | 0.006053  |
| Help_comp4639_c0_seq1  | Ras-like without CAAX 1                                   | 2.18977                 | 5.00889                 | -1.19371                            | 0.035438  |
| Help_comp3728_c1_seq1  | Macrophage colony-stimulating factor 1                    | 0.319688                | 1.51881                 | -2.24821                            | 0.000882  |
| Help_comp4419_c0_seq9  | Hepatocyte cell adhesion molecule                         | 0.481206                | 3.83589                 | -2.99484                            | 0.037629  |

|                        |                                                           |           |          |               |           |
|------------------------|-----------------------------------------------------------|-----------|----------|---------------|-----------|
| Help_comp25610_c0_seq1 | ras homolog gene family, member C                         | 0.042223  | 0.971676 | -4.52438      | 0.0082717 |
| Help_comp10168_c0_seq4 | similar to butyrophilin, subfamily 1                      | 0.0942799 | 4.06144  | -5.4289       | 0.041373  |
| Help_comp36533_c0_seq1 | radical S-adenosyl methionine domain-containing protein 2 | 0         | 0.727092 | -1.79769e+308 | 0.0196517 |
